# Supplementary material for: Numerical insights into the early stages of nanoscale electrodeposition: nanocluster surface diffusion and aggregative growth
Source: Royal Society of Chemistry journal article supplement (doi:10.1039/c7nr08529j), 2018-01-01
Supplement: c7nr08529j1.pdf [file c7nr08529j1.pdf]

## Supporting Information

### **Numerical insights into the early stages of nanoscale electrodeposition: nanocluster surface diffusion and aggregative growth<sup>†</sup>**

Mesfin Haile Mamme,<sup>\*a, b</sup> Christoph Köhn,<sup>a, c</sup> Johan Deconinck<sup>a</sup>, Jon Ustarroz,<sup>\*a</sup>

<sup>a</sup>*Vrije Universiteit Brussel (VUB), Research Group Electrochemical and Surface Engineering (SURF), Pleinlaan 2, 1050 Brussels, Belgium.*

<sup>b</sup>*Vrije Universiteit Brussel (VUB), Department of Electrical Engineering and Power Electronics, Pleinlaan 2, 1050 Brussels, Belgium.*

<sup>c</sup>*DTU Space, National Space Institute, Technical University of Denmark, Elektrovej 328, 2800 Lyngby, Denmark.*

\*Corresponding authors: [mmamme@vub.be](mailto:mmamme@vub.be), [jon.ustarroz@vub.be](mailto:jon.ustarroz@vub.be)

## S1. Influence of the threshold size for defining a cluster on the early stages of cluster formation and aggregation

**Figure S1** shows the evolution of the number and density of clusters as a function of time when all the clusters of  $R \geq 1$  nm (a) or of  $R \geq 2$  nm (b) are taken into account, for different values of  $F$  and  $\alpha$ .

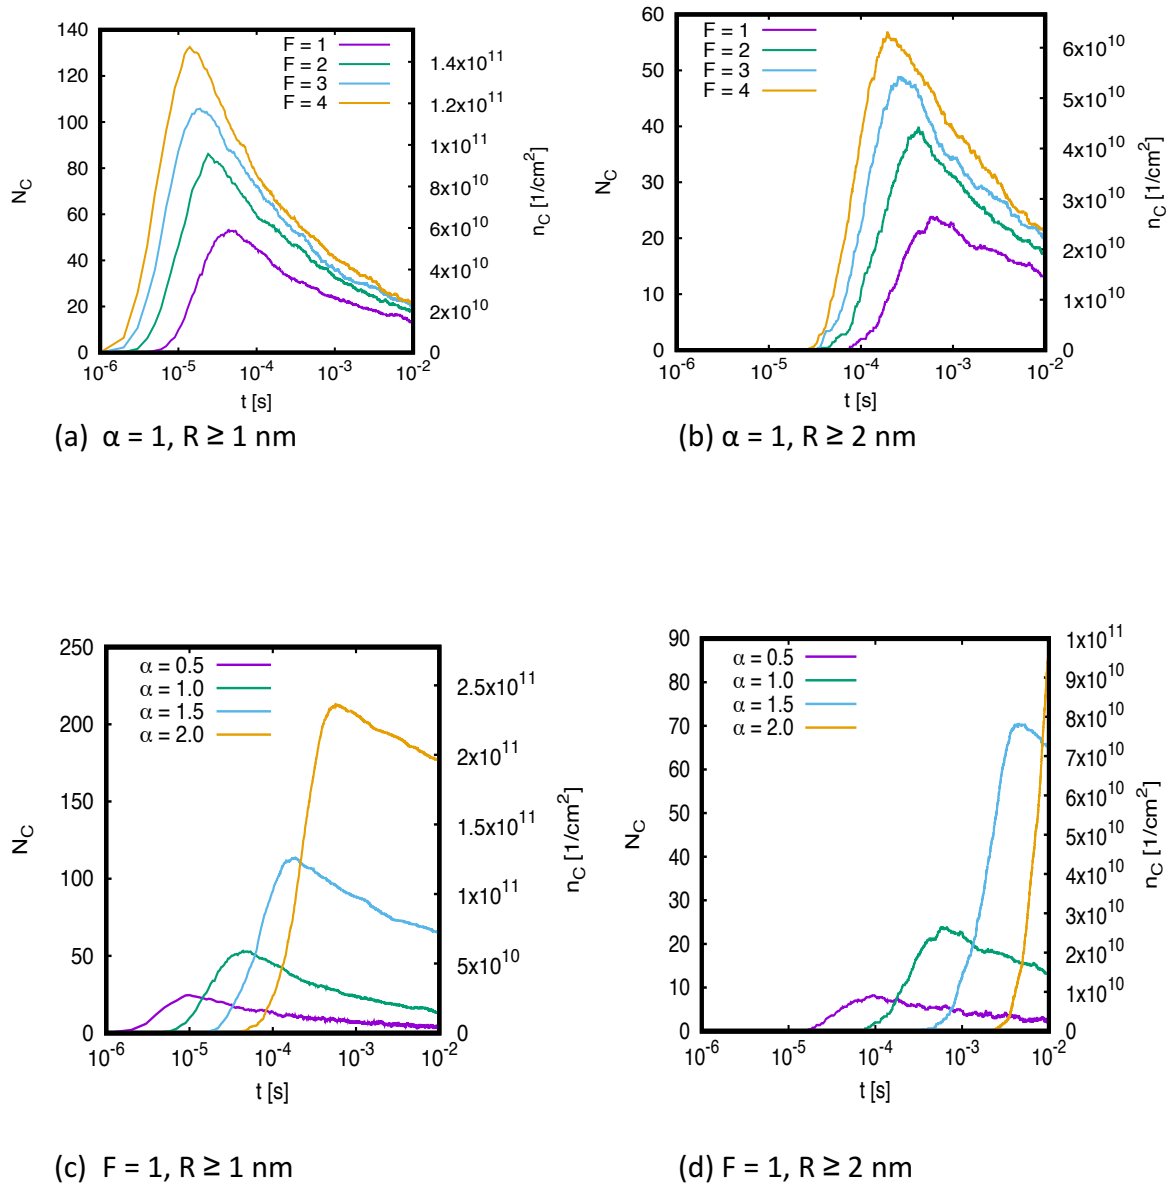

**Figure S1.** Evolution with time of the number of clusters and cluster density with  $\alpha = 1$  for different values of  $F$  (top) and with  $F = 1$  and different values of  $\alpha$  (bottom). All clusters with of  $R \geq 1$  nm are considered in (a) and (c) and all clusters with of  $R \geq 2$  nm (b) and (d).

## S2. Influence of the relative surface mobility on the cluster size distributions

**Figure S2** shows the histograms of the size distributions of all the individual particles as a function of time, for  $F = 1$  and  $\alpha = 1$ . Increasing the deposition time results in a larger dispersion of the particle sizes and in a decrease of the number of adatoms and small adatom aggregates.

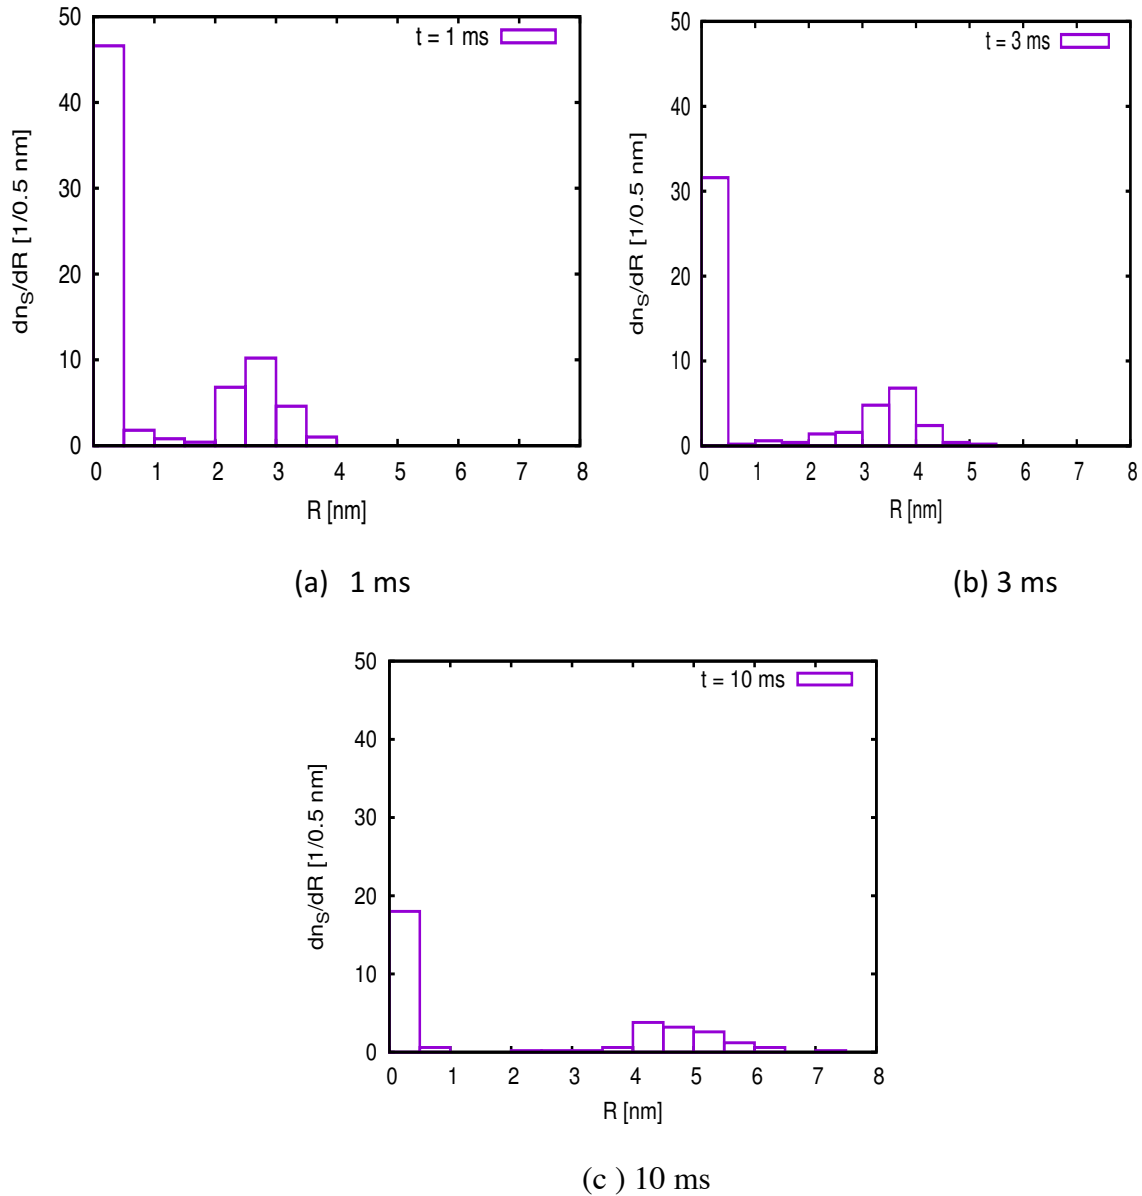

**Figure S2.** Size distribution histogram for  $\alpha = 1$  and  $F = 1$  after 1ms (a), 3ms (b) and 10ms (c).
